# Supplementary material for: Reversal of High-Fat Diet-Induced Non-Alcoholic Fatty Liver Disease by Metformin Combined with PGG, an Inducer of Glycine N-Methyltransferase
Source: MDPI journal article supplement (doi:10.3390/ijms231710072), 2022-09-03
Supplement: s1 [file s1]

## **Supplementary material**

Reversal of High-Fat Diet-induced Non-Alcoholic Fatty Liver Disease by  
Metformin Combined with PGG<sub>2</sub>, an inducer of Glycine N-methyltransferase

Ming-Hui Yang, Wei-You Li, Ching-Fen Wu, Yi-Ching Lee, Allan Yi-Nan Chen,  
Yu-Chang Tyan\*, Yi-Ming Arthur Chen\*

### **Table of contents**

|                               |        |
|-------------------------------|--------|
| Supplementary Figure S1 ..... | Page 2 |
| Supplementary Table S1. ....  | Page 3 |
| Supplementary Table S2. ....  | Page 3 |

Figure

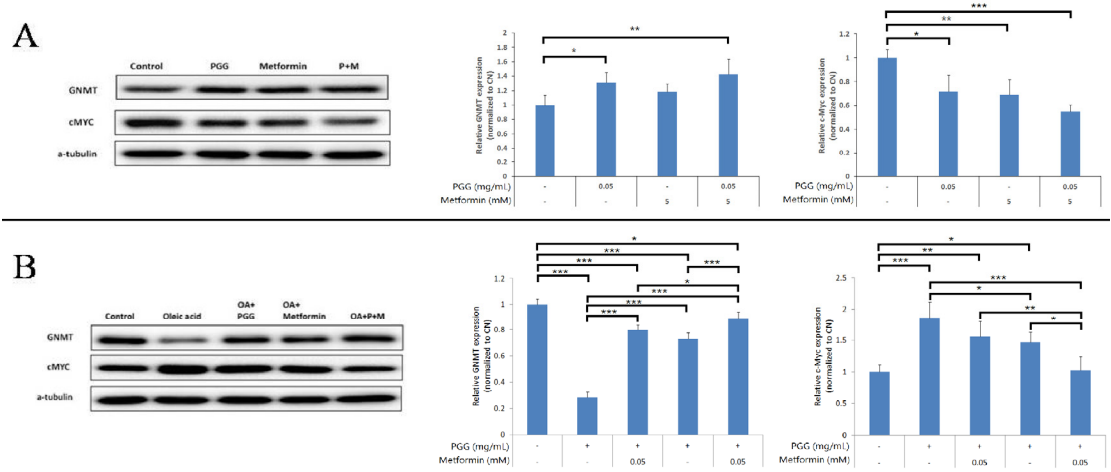

**Supplementary Figure S1.** Protein expression detection of GNMT and c-Myc from Mahlavu cells without oleic acid (A) and with oleic acid(B). (\* $p < 0.05$ ; \*\* $p < 0.01$ ; \*\*\* $p < 0.001$ ) (N=3/group)

## Tables

**Supplementary Table S1.** Primer sequences.

| Target         | Primer sequences (5'-3')           |
|----------------|------------------------------------|
| GNMT           | Forward: GTTGACGCTGGACAAAGA        |
|                | Reverse: AGCCTGTGCTGAGGATA         |
| SREBP-1c       | Forward: CACTTCTGGAGACATCGCAAAC    |
|                | Reverse: ATGGTAGACAACAGCCGCATC     |
| PPAR $\alpha$  | Forward: CAAGGCCTCAGGGTACCACT      |
|                | Reverse: TTGCAGCTCCGATCACACTT      |
| PPAR $\gamma$  | Forward: ATTCTGGCCCACCAACTTCGG     |
|                | Reverse: TGGAAGCCTGATGCTTATCCCCA   |
| TNF $\alpha$   | Forward: GCCTCTTCTCATTCTGCTTG      |
|                | Reverse: CTGATGAGAGGGAGGCCATT      |
| IL-1 $\beta$   | Forward: CCAGCTTCAAATCTCACAGCAG    |
|                | Reverse: CTTCTTTGGGTATTGCTTGGGATC  |
| $\beta$ -actin | Forward: TGCTCGGGACGTTACAAC        |
|                | Reverse: GAGAATAAAGCAACTGCACAAACAA |

**Supplementary Table S2.** The steatosis scores among different groups of mice.

| Group                 | Score            |
|-----------------------|------------------|
| Control               | 0                |
| HDF                   | 2.29 $\pm$ 0.27  |
| HDF + metformin       | 1.38 $\pm$ 0.42  |
| HDF + PGG             | 2.13 $\pm$ 0.29  |
| HDF + metformin + PGG | 1.13 $\pm$ 0.4 * |

\*: p<0.05 ; (N=10/group)
